# Supplementary material for: A Possibility to Use Selected Crop Post-Extraction Wastes to Improve the Composition of Cultivated Mushroom Pleurotus citrinopileatus
Source: MDPI journal article supplement (doi:10.3390/jof7110894), 2021-10-22
Supplement: s1 [file s1]

**Table S1.** Validation data for elemental analysis by ICP-OES

|           | wavelength | DL                  | range               | uncertainty |           | wavelength | DL                  | range               | uncertainty |
|-----------|------------|---------------------|---------------------|-------------|-----------|------------|---------------------|---------------------|-------------|
|           | nm         | mg kg <sup>-1</sup> | mg kg <sup>-1</sup> | %           |           | nm         | mg kg <sup>-1</sup> | mg kg <sup>-1</sup> | %           |
| <b>Ag</b> | 328.068    | 0.0086              | DL-200              | 10.0        | <b>Mo</b> | 202.032    | 0.044               | DL-100              | 3.1         |
| <b>Al</b> | 394.401    | x                   | 200-4000            | 6.5         | <b>Na</b> | 588.995    | 0.26                | DL-1000             | 6.7         |
| <b>Al</b> | 396.152    | 0.0053              | DL-200              | 2.9         | <b>Na</b> | 589.592    | x                   | 1000-10000          | 3.4         |
| <b>As</b> | 188.980    | 0.012               | DL-100              | 14.6        | <b>Nb</b> | 313.078    | 0.0067              | DL-100              | 5.8         |
| <b>Au</b> | 197.742    | 0.0092              | DL-100              | 18.0        | <b>Nd</b> | 406.108    | 0.012               | DL-100              | 6.2         |
| <b>B</b>  | 249.772    | 0.047               | DL-200              | 3.4         | <b>Ni</b> | 231.604    | 0.0092              | DL-200              | 8.0         |
| <b>Ba</b> | 455.403    | 0.002               | DL-200              | 9.0         | <b>Os</b> | 225.585    | 0.021               | DL-100              | 9.5         |
| <b>Be</b> | 313.042    | 0.026               | DL-100              | 12.0        | <b>Pb</b> | 220.353    | 0.023               | DL-200              | 4.2         |
| <b>Bi</b> | 223.061    | 0.065               | DL-200              | 4.1         | <b>Pd</b> | 340.458    | 0.025               | DL-100              | 9.0         |
| <b>Ca</b> | 315.887    | x                   | 2000-10000          | 6.4         | <b>Pr</b> | 417.939    | 0.032               | DL-100              | 9.8         |
| <b>Ca</b> | 422.673    | 0.036               | DL-2000             | 2.8         | <b>Pt</b> | 203.646    | 0.021               | DL-100              | 29.8        |
| <b>Cd</b> | 214.439    | 0.0026              | DL-200              | 10.1        | <b>Rb</b> | 780.026    | 0.045               | DL-100              | 10.1        |
| <b>Ce</b> | 446.021    | 0.023               | DL-100              | 13.6        | <b>Re</b> | 197.248    | 0.032               | DL-100              | 5.0         |
| <b>Co</b> | 238.892    | 0.0029              | DL-200              | 1.6         | <b>Rh</b> | 343.488    | 0.035               | DL-100              | 13.3        |
| <b>Cr</b> | 267.716    | 0.0033              | DL-200              | 4.0         | <b>Ru</b> | 240.272    | 0.021               | DL-100              | 9.4         |
| <b>Cs</b> | 697.327    | 0.02                | DL-1000             | 12.1        | <b>S</b>  | 181.972    | 0.44                | DL-1000             | 15.7        |
| <b>Cu</b> | 327.395    | 0.0027              | DL-200              | 9.6         | <b>Sb</b> | 206.834    | 0.012               | DL-100              | 14.0        |
| <b>Dy</b> | 364.540    | 0.023               | DL-100              | 6.7         | <b>Sc</b> | 361.383    | 0.024               | DL-100              | 3.0         |
| <b>Er</b> | 349.910    | 0.018               | DL-100              | 7.9         | <b>Se</b> | 196.026    | 0.011               | DL-100              | 16.4        |
| <b>Eu</b> | 420.504    | 0.034               | DL-100              | 3.0         | <b>Si</b> | 288.158    | 0.59                | DL-1000             | 19.2        |
| <b>Fe</b> | 238.204    | 0.0084              | DL-1000             | 1.6         | <b>Sm</b> | 442.434    | 0.026               | DL-100              | 9.8         |
| <b>Fe</b> | 261.382    | x                   | 100-4000            | 0.89        | <b>Sn</b> | 283.998    | 0.067               | DL-100              | 12.3        |
| <b>Ga</b> | 294.363    | 0.0097              | DL-200              | 3.4         | <b>Sr</b> | 460.733    | 0.0092              | DL-200              | 5.3         |
| <b>Gd</b> | 342.246    | 0.034               | DL-100              | 6.1         | <b>Ta</b> | 268.517    | 0.012               | DL-100              | 6.5         |
| <b>Ge</b> | 209.426    | 0.039               | DL-100              | 2.2         | <b>Tb</b> | 350.914    | 0.027               | DL-100              | 7.3         |
| <b>Hf</b> | 264.141    | 0.012               | DL-100              | 5.8         | <b>Te</b> | 214.282    | 0.011               | DL-100              | 5.5         |
| <b>Hg</b> | 194.164    | 0.023               | DL-100              | 14.6        | <b>Th</b> | 283.730    | 0.015               | DL-100              | 4.1         |
| <b>Ho</b> | 348.484    | 0.031               | DL-100              | 11.9        | <b>Ti</b> | 336.122    | 0.021               | DL-100              | 5.7         |
| <b>In</b> | 230.606    | 0.025               | DL-200              | 8.0         | <b>Tl</b> | 190.794    | 0.024               | DL-200              | 7.3         |
| <b>Ir</b> | 205.116    | 0.0097              | DL-100              | 6.5         | <b>Tm</b> | 336.261    | 0.031               | DL-100              | 7.6         |
| <b>K</b>  | 766.491    | 0.34                | DL-1000             | 1.3         | <b>U</b>  | 385.957    | 0.011               | DL-100              | 5.6         |
| <b>K</b>  | 769.897    | x                   | 1000-10000          | 0.53        | <b>V</b>  | 292.401    | 0.018               | DL-100              | 6.2         |
| <b>La</b> | 398.852    | 0.0086              | DL-100              | 6.8         | <b>W</b>  | 207.912    | 0.027               | DL-1000             | 12.3        |
| <b>Li</b> | 670.783    | 0.0044              | DL-200              | 16.6        | <b>Y</b>  | 361.104    | 0.031               | DL-100              | 6.2         |
| <b>Lu</b> | 307.760    | 0.031               | DL-100              | 2.9         | <b>Yb</b> | 328.937    | 0.014               | DL-100              | 3.8         |
| <b>Mg</b> | 279.553    | 0.008               | DL-500              | 9.7         | <b>Zn</b> | 213.857    | 0.0022              | DL-200              | 3.5         |
| <b>Mg</b> | 285.213    | x                   | 500-5000            | 4.5         | <b>Zr</b> | 343.823    | 0.018               | DL-100              | 6.5         |
| <b>Mn</b> | 257.610    | 0.0021              | DL-200              | 1.8         |           |            |                     |                     |             |
